# Supplementary material for: Inside the decentralised casino: A longitudinal study of actual cryptocurrency gambling transactions
Source: PubMed Central journal article supplement (PMC7592737; doi:10.1371/journal.pone.0240693), 2020-10-28
Supplement: pone.0240693.s001.pdf [file pone.0240693.s001.pdf]

**S1 Table.** Gambling behaviour of extreme 5 and 95% subgroups of casino bettors, reprinted from LaBrie et al's 2008 study [1].

| <b>Measure</b> | <b>Most involved casino bettors<br/>top 5% (<i>n</i> = 212)</b> |               | <b>Other 95% of<br/>participants (<i>n</i> = 4,010)</b> |               |
|----------------|-----------------------------------------------------------------|---------------|---------------------------------------------------------|---------------|
|                | <b>Mean (SD)</b>                                                | <b>Median</b> | <b>Mean (SD)</b>                                        | <b>Median</b> |
| Age            | 34 (9)                                                          | 32            | 30 (9)                                                  | 28            |
| Duration       | 476 (232)                                                       | 529           | 290 (233)                                               | 246           |
| Frequency      | 24% (17)                                                        | 20%           | 16% (21)                                                | 7%            |
| Number of bets | 24,558 (36,779)                                                 | 10,465        | 2,403 (7,819)                                           | 486           |
| Bets per day   | 285 (344)                                                       | 188           | 107 (176)                                               | 46            |
| Euros per Bet  | 213 (682)                                                       | 25            | 25 (97)                                                 | 4             |
| Total Wagered  | 345,579 (354,890)                                               | 233,195       | 10,338 (19,360)                                         | 2,284         |
| Net Loss       | 8,746 (11,213)                                                  | 6,698         | 422 (939)                                               | 107           |
| Percent Loss   | 2.6 (3)                                                         | 2.5           | 8.0 (12)                                                | 5.9           |

1. LaBrie, R.A., Kaplan, S.A., LaPlante, D.A., Nelson, S.E., Shaffer, H.J.: Inside the virtual casino: A prospective longitudinal study of actual internet casino gambling. *European journal of public health* **18**(4), 410–416 (2008)
